# Supplementary material for: Integrating multi-trait and multi-index approaches for identifying drought tolerant tropical maize genotypes
Source: Frontiers journal article supplement (doi:10.3389/fsufs.2025.1608307), 2025-09-03
Supplement: Table_1.xlsx [file Table_1.xlsx]

## Sheet: Sheet1
Anova Analysis of Traits
Grain yield	Df	Sum Sq	Mean Sq	F value	Pr(>F)
Genotype (G)	32	81.8	2.6	3.35	3.93e-08	***
Location (L)	1	14.3	14.3	18.775	2.1e-05	***
Treatment (T)	1	1909.6	1909.6	2503.45	< 2e-16	***
G x L	32	56.7	1.8	2.323	0.000156	***
G x T	32	49.6	1.5	2.03	0.001392	**
L x T	1	916.4	916.4	1201.44	< 2e-16	***
G x L x T	32	49.7	1.6	2.037	0.001326	**
Residuals	262	199.8	0.8
Shelling percentage (SP)	Df	Sum Sq	Mean Sq	F value	Pr(>F)
Genotype (G)	32	0.12924	0.00404	5.399	1.9e-15	***
Location (L)	1	0.00555	0.00555	7.423	0.00687	**
Treatment (T)	1	0.07542	0.07542	100.828	< 2e-16	***
G x L	32	0.03727	0.00116	1.557	0.03325	*
G x T	32	0.04215	0.00132	1.761	0.00911	**
L x T	1	0.03254	0.03254	43.498	2.33e-10	***
G x L x T	32	0.0429	0.00134	1.792	0.00738	**
Residuals	262	0.19599	0.00075
1000 kernel weight (1000KW)	Df	Sum Sq	Mean Sq	F value	Pr(>F)
Genotype (G)	32	157503	4922	4.649	8.31e-13	***
Location (L)	1	249699	249699	235.865	< 2e-16	***
Treatment (T)	1	863326	863326	815.496	< 2e-16	***
G x L	32	41360	1292	1.221	0.200338
G x T	32	74219	2319	2.191	0.000425	***
L x T	1	307073	307073	290.061	< 2e-16	***
G x L x T	32	52795	1650	1.558	0.032966	*
Residuals	262	277367	1059
No of kernel per row (NKR)	Df	Sum Sq	Mean Sq	F value	Pr(>F)
Genotype (G)	32	814.6	25.5	3.846	6.38e-10	***
Location (L)	1	76.2	76.2	11.505	0.000801	***
Treatment (T)	1	1495.1	1495.1	225.857	< 2e-16	***
G x L	32	342.5	10.7	1.617	0.023055	*
G x T	32	517.2	16.2	2.442	6.2e-05	***
L x T	1	2059.7	2059.7	311.141	< 2e-16	***
G x L x T	32	371.1	11.6	1.752	0.009651	**
Residuals	262	1734.4	6.6
No of rows (NR)	Df	Sum Sq	Mean Sq	F value	Pr(>F)
Genotype (G)	32	172.9	5.4	9.821	< 2e-16 ***
Location (L)	1	124.01	124.01	225.404	< 2e-16 ***
Treatment (T)	1	18.76	18.76	34.107	1.54e-08 ***
G x L	32	21.03	0.66	1.194	0.22553
G x T	32	36.57	1.14	2.077	0.000988 ***
L x T	1	0.85	0.85	1.554	0.213655
G x L x T	32	22.16	0.69	1.259	0.168103
Residuals	262	144.14	0.55
Ear diameter (ED)	Df	Sum Sq	Mean Sq	F value	Pr(>F)
Genotype (G)	32	646	20	2.734	6.11e-06	***
Location (L)	1	1440	1440	194.989	< 2e-16	***
Treatment (T)	1	2440	2440	330.521	< 2e-16	***
G x L	32	380	12	1.61	0.023974	*
G x T	32	495	15	2.095	0.000865	***
L x T	1	8280	8280	1121.49	< 2e-16	***
G x L x T	32	382	12	1.616	0.023122	*
Residuals	262	1934	7
Ear length (EL)	Df	Sum Sq	Mean Sq	F value	Pr(>F)
Genotype (G)	32	185.1	5.8	5.964	2e-16	***
Location (L)	1	88.6	88.6	91.354	2e-16	***
Treatment (T)	1	465.9	465.9	480.257	2e-16	***
G x L	32	66.9	2.1	2.156	0.000552	***
G x T	32	64.9	2	2.092	0.000889	***
L x T	1	330.3	330.3	340.461	2e-16	***
G x L x T	32	71.8	2.2	2.313	0.000168	***
Residuals	262	254.2	1
SPAD	Df	Sum Sq	Mean Sq	F value	Pr(>F)
Genotype (G)	32	1723	54	3.349	3.94e-08	***
Location (L)	1	713	713	44.366	1.59e-10	***
Treatment (T)	1	23284	23284	1448.08	2e-16	***
G x L	32	1139	36	2.213	0.00036	***
G x T	32	1723	54	3.349	3.94e-08	***
L x T	1	713	713	44.366	1.59e-10	***
G x L x T	32	1139	36	2.213	0.00036	***
Residuals	262	4213	16
Leaf angle (LA)	Df	Sum Sq	Mean Sq	F value	Pr(>F)
Genotype (G)	32	4200	131.2	11.6	2e-16	***
Location (L)	1	111	110.5	9.767	0.001976	**
Treatment (T)	1	1582	1582.4	139.852	2e-16	***
G x L	32	399	12.5	1.102	0.330231
G x T	32	836	26.1	2.309	0.000173	***
L x T	1	113	113.5	10.031	0.001722	**
G x L x T	32	288	9	0.794	0.780245
Residuals	262	2964	11.3
ASI	Df	Sum Sq	Mean Sq	F value	Pr(>F)
Genotype (G)	32	112.75	3.52	3.015	6.18e-07	***
Location (L)	1	61.45	61.45	52.593	4.63e-12	***
Treatment (T)	1	113.49	113.49	97.129	2e-16	***
G x L	32	47.21	1.48	1.263	0.165
G x T	32	37.84	1.18	1.012	0.455
L x T	1	20.45	20.45	17.505	3.91e-05	***
G x L x T	32	49.88	1.56	1.334	0.116
Residuals	262	306.15	1.17
Leaf area	Df	Sum Sq	Mean Sq	F value	Pr(>F)
Genotype (G)	32	569348	17792	5.437	1.4e-15	***
Location (L)	1	128682	128682	39.325	1.47e-09	***
Treatment (T)	1	946618	946618	289.285	2e-16	***
G x L	32	131699	4116	1.258	0.169
G x T	32	85766	2680	0.819	0.746
L x T	1	500958	500958	153.092	2e-16	***
G x L x T	32	399172	12474	3.812	8.43e-10	***
Residuals	262	857333	3272
Stem diameter (SD)	Df	Sum Sq	Mean Sq	F value	Pr(>F)
Genotype (G)	32	207.3	6.48	3.915	3.58e-10	***
Location (L)	1	56.1	56.13	33.916	1.68e-08	***
Treatment (T)	1	108.6	108.62	65.638	2.07e-14	***
G x L	32	42.7	1.34	0.807	0.762631
G x T	32	107.5	3.36	2.029	0.001402	**
L x T	1	24.2	24.15	14.595	0.000166	***
G x L x T	32	36	1.12	0.679	0.905776
Residuals	262	433.6	1.65
Plant height (PH)	Df	Sum Sq	Mean Sq	F value	Pr(>F)
Genotype (G)	32	55531	1735	4.491	3.06e-12	***
Location (L)	1	15097	15097	39.069	1.65e-09	***
Treatment (T)	1	112060	112060	289.99	< 2e-16	***
G x L	32	9893	309	0.8	0.77235
G x T	32	15824	495	1.28	0.15195
L x T	1	4898	4898	12.675	0.00044	***
G x L x T	32	9177	287	0.742	0.84397
Residuals	262	101243	386

## Sheet: Sheet 1
Trait	Genotype	GxL	GxT	LxT	GxLxT
TT
TTkl
RTTkl
DB
Ls_Dn
UBJ
UBB
ASI
SdtDn
SPD_75
PTkl
DmTkl
J_brs
J_bij
B1000Bj
rend
Hasil
